# Supplementary material for: Metabolomics reveals perturbations in endometrium and serum of minimal and mild endometriosis
Source: PubMed Central journal article supplement (PMC5915433; doi:10.1038/s41598-018-23954-7), 2018-04-24
Supplement: 41598_2018_23954_MOESM1_ESM.pdf [file 41598_2018_23954_MOESM1_ESM.pdf]

# **Metabolomics reveals perturbations in endometrium and serum of minimal and mild endometriosis**

Mainak Dutta<sup>1,2</sup>, Brajesh Singh<sup>1</sup>, Mamata Joshi<sup>3</sup>, Debanjan Das<sup>1,10</sup>, Elavarasan Subramani<sup>1</sup>, Meenu Maan<sup>4</sup>, Saikat Kumar Jana<sup>5</sup>, Uma Sharma<sup>6</sup>, Soumen Das<sup>1</sup>, Swagata Dasgupta<sup>7</sup>, Chaitali Datta Ray<sup>8</sup>, Baidyanath Chakravarty<sup>9</sup>, Koel Chaudhury<sup>1</sup>

<sup>1</sup>*School of Medical Science and Technology, Indian Institute of Technology, Kharagpur, West Bengal, India*

<sup>2</sup>*Department of Biotechnology, Birla Institute of Technology and Science, Pilani (Dubai Campus), Dubai, United Arab Emirates*

<sup>3</sup>*National Facility for High-field NMR, Tata Institute of Fundamental Research, Mumbai, Maharashtra, India*

<sup>4</sup>*School of Biotechnology, Jawaharlal Nehru University, New Delhi, Delhi, India*

<sup>5</sup>*Department of Chemical and Bio-Technology, National Institute of Technology, Arunachal Pradesh, India*

<sup>6</sup>*Department of N.M.R., All India Institute of Medical Sciences, New Delhi, Delhi, India*

<sup>7</sup>*Department of Chemistry, Indian Institute of Technology, Kharagpur, West Bengal, India*

<sup>8</sup>*Institute of Post Graduate Medical Education & Research, Obstetrics & Gynecology, Kolkata, West Bengal, India*

<sup>9</sup>*Institute of Reproductive Medicine, Sector-III, Kolkata, West Bengal, India*

<sup>10</sup>*Department of Electronics & Communication Engineering, DSPM-IIIT, Naya Raipur, CG, India*

## **Supplementary Information**

**Identification of metabolites:** Each chemically distinct moieties having distinct hydrogen nucleus in each metabolite exhibit an NMR signal at a characteristic resonance frequency, which is measured as a chemical shift relative to a standard compound. The exact chemical shift of the NMR signal of a hydrogen nucleus in a metabolite is precisely characteristic of that nucleus, in that metabolite, in the particular matrix conditions. In addition to chemical shift, another feature which is used for metabolite identification is spin multiplicity. Peaks arising from equivalent spin system protons split into more than one peak (multiplets: doublets (d), double doublets (dd), triplet (t), quartet (q)) due to chemically in-equivalent neighboring protons. This effect of spin-spin splitting is transmitted through bonds and is applicable only when the two nuclei are very close (maximum distance is three bonds) in the bonding network. The distance between the peaks in a given multiplet is a measure of the magnitude of splitting effect. It is referred to as coupling-constant and is independent of the applied field strength and depend only upon the molecular structure. Spin multiplicity thus provides vital information in determining neighboring protons. The method allowed manual identification of several metabolites from diverse chemical classes. Individual metabolites were also further verified from various sources, including earlier published articles, literatures and cross checked from the Human Metabolome Database (HMDB). Also, peak assignment was validated with COSY (Correlation spectroscopy) and TOCSY (Total correlation spectroscopy) spectra. The list of identified metabolites along with chemical shift and the type of multiplicity detected is provided in Supplementary Table 1.

Supplementary Table 1: List of metabolites detected in endometrial tissue extract using NMR

| Metabolites           | Moieties                                                                                 | <sup>1</sup> H ppm<br>(multiplicity) <sup>#</sup> | Identified in                  |
|-----------------------|------------------------------------------------------------------------------------------|---------------------------------------------------|--------------------------------|
| 3-hydroxybutyric acid | $\gamma\text{CH}_3$ , $\frac{1}{2}\alpha\text{CH}_2$ ,<br>$\frac{1}{2}\alpha\text{CH}_2$ | 1.20 (d), 2.31 (dd),<br>2.41 (dd)                 | <sup>1</sup> H, TOCSY,<br>COSY |
| Acetic acid           | CH <sub>3</sub>                                                                          | 1.92 (s)                                          | <sup>1</sup> H                 |
| Adenine               | 2-CH, 6-CH                                                                               | 8.19 (s), 8.21 (s)                                | <sup>1</sup> H, TOCSY,<br>COSY |
| Alanine               | $\beta\text{CH}_3$ , $\alpha\text{CH}$                                                   | 1.5 (d), 3.79 (m)                                 | <sup>1</sup> H, TOCSY,<br>COSY |
| Asparagine            | CH <sub>2</sub> , CH                                                                     | 2.94 (m), 4.0 (m)                                 | <sup>1</sup> H, TOCSY,<br>COSY |
| Aspartic acid         | $\frac{1}{2}\beta\text{CH}_2$ , $\frac{1}{2}\beta\text{CH}_2$ ,<br>$\alpha\text{CH}$     | 2.68 (dd), 2.82 (m),<br>3.89 (m)                  | <sup>1</sup> H, TOCSY,<br>COSY |
| Choline               | N-(CH <sub>3</sub> ) <sub>3</sub> , $\beta\text{CH}_2$ ,<br>$\alpha\text{CH}_2$          | 3.2 (s), 3.51 (t), 4.05<br>(t)                    | <sup>1</sup> H, TOCSY,<br>COSY |
| Citric acid           | $\frac{1}{2}\text{CH}_2$ , $\frac{1}{2}\text{CH}_2$                                      | 2.55 (d), 2.69 (d)                                | <sup>1</sup> H, TOCSY,<br>COSY |
| Creatine              | CH <sub>3</sub> , CH <sub>2</sub>                                                        | 3.05 (s), 3.93 (s)                                | <sup>1</sup> H, TOCSY,<br>COSY |
| Formic acid           | CH                                                                                       | 8.47(s)                                           | <sup>1</sup> H                 |
| Glutamic acid         | $\alpha\text{CH}$ , $\gamma\text{CH}_2$                                                  | 3.75 (m), 2.36 (m)                                | <sup>1</sup> H, TOCSY,         |

| Metabolites                    | Moieties                                                                           | <sup>1</sup> H ppm<br>(multiplicity) <sup>#</sup>     | Identified in                  |
|--------------------------------|------------------------------------------------------------------------------------|-------------------------------------------------------|--------------------------------|
|                                |                                                                                    |                                                       | COSY                           |
| Glutamine                      | βCH <sub>2</sub> , γCH <sub>2</sub> , αCH,                                         | 2.15 (m), 2.46 (m),<br>3.77 (m)                       | <sup>1</sup> H, TOCSY,<br>COSY |
| Glycine                        | αCH                                                                                | 3.58 (s)                                              | <sup>1</sup> H                 |
| Glycogen                       | 1-CH                                                                               | 5.4 (m broad)                                         | <sup>1</sup> H                 |
| Inosine                        | 8-CH, 14-CH                                                                        | 8.2 (s), 8.3 (s)                                      | <sup>1</sup> H, TOCSY,<br>COSY |
| <i>myo</i> -Inositol           | H1/H3 CH, H4/H6<br>CH                                                              | 3.48 (dd),<br>3.6 (t)                                 | <sup>1</sup> H, TOCSY,<br>COSY |
| Isoleucine                     | δCH <sub>3</sub> , βCH <sub>3</sub> , γCH <sub>2</sub> ,<br>βCH, αCH               | 0.94(t), 1.02(d),<br>1.46 (m), 1.98 (m),<br>3.68 (d)  | <sup>1</sup> H, TOCSY,<br>COSY |
| Lactic acid                    | βCH <sub>3</sub> , αCH                                                             | 1.35(d), 4.13(q)                                      | <sup>1</sup> H, TOCSY,<br>COSY |
| Leucine                        | δCH <sub>3</sub> , γCH, αCH,                                                       | 0.96 (d), 1.7 (m),<br>3.73 (t),                       | <sup>1</sup> H, TOCSY,<br>COSY |
| Lysine                         | γCH <sub>2</sub> , δCH <sub>2</sub> , βCH <sub>2</sub> ,<br>εCH <sub>2</sub> , αCH | 1.48 (m), 1.73 (m),<br>1.91 (m), 3.03 (t),<br>3.76(t) | <sup>1</sup> H, TOCSY,<br>COSY |
| Methionine                     | δCH <sub>3</sub> , βCH <sub>2</sub> , γCH <sub>2</sub>                             | 2.14 (s), 2.16 (m),<br>2.65 (t)                       | <sup>1</sup> H, TOCSY,<br>COSY |
| Nicotinurate                   | 4-CH, 2-CH                                                                         | 8.25 (d), 8.92 (s)                                    | <sup>1</sup> H, TOCSY,<br>COSY |
| Ornithine                      | δCH <sub>2</sub> , αCH                                                             | 3.08 (m), 3.74(m)                                     | <sup>1</sup> H, TOCSY,<br>COSY |
| Phenylalanine                  | Ring-CH                                                                            | 7.35 (m), 7.40 (t),<br>7.45 (m)                       | <sup>1</sup> H, TOCSY,<br>COSY |
| Proline                        | CH <sub>2</sub> , CH                                                               | 2.08 (m), 3.4 (m)                                     | <sup>1</sup> H, TOCSY,<br>COSY |
| Succinic acid                  | CH <sub>3</sub>                                                                    | 2.39 (s)                                              | <sup>1</sup> H                 |
| Taurine                        | CH <sub>2</sub> -SO <sub>3</sub> , CH <sub>2</sub> -NH                             | 3.26 (t), 3.42 (t)                                    | <sup>1</sup> H, TOCSY,<br>COSY |
| Threonine                      | αCH, βCH                                                                           | 3.59(d), 4.24 (m)                                     | <sup>1</sup> H, TOCSY,<br>COSY |
| Tyrosine                       | CH, CH                                                                             | 6.92 (d), 7.21 (d)                                    | <sup>1</sup> H, TOCSY,<br>COSY |
| Uracil                         | CH, CH                                                                             | 5.8 (d), 7.5 (d)                                      | <sup>1</sup> H, TOCSY,<br>COSY |
| Uridine                        | 12-CH, 11-CH                                                                       | 5.88 (d), 7.88 (d)                                    | <sup>1</sup> H, TOCSY,<br>COSY |
| Valine                         | γCH <sub>3</sub> , γ'CH <sub>3</sub> , αCH,<br>βCH                                 | 0.99 (d), 1.05 (d),<br>3.62 (d), 2.28 (m)             | <sup>1</sup> H, TOCSY,<br>COSY |
| α-Glucose                      | 1-CH                                                                               | 5.24 (d)                                              | <sup>1</sup> H, TOCSY,<br>COSY |
| β-Glucose                      | 1-CH                                                                               | 4.66 (d)                                              | <sup>1</sup> H, TOCSY,<br>COSY |
| Glucose & mixed<br>amino acids | (αCH)-resonances                                                                   | 3.3-3.9                                               | <sup>1</sup> H, TOCSY,<br>COSY |

<sup>#</sup>Key: s: singlet; d: doublet, dd: doublet of doublets; t: triplet; q: quartet; m: multiplet

Supplementary Table 2: Model parameters of the supervised models

| Model parameters (Tissue) |           | Stage I | (Stage II) | (Stage III) | Stage IV |
|---------------------------|-----------|---------|------------|-------------|----------|
| <b>PLS-DA</b>             | R2X (Cum) | 0.208   | 0.176      | 0.168       | 0.269    |
|                           | R2Y (Cum) | 0.943   | 0.992      | 0.903       | 0.981    |
|                           | Q2 (Cum)  | 0.669   | 0.83       | 0.707       | 0.933    |
| <b>OPLS-DA</b>            | R2X (Cum) | 0.208   | 0.176      | 0.168       | 0.227    |
|                           | R2Y (Cum) | 0.942   | 0.992      | 0.903       | 0.964    |
|                           | Q2 (Cum)  | 0.692   | 0.835      | 0.729       | 0.93     |

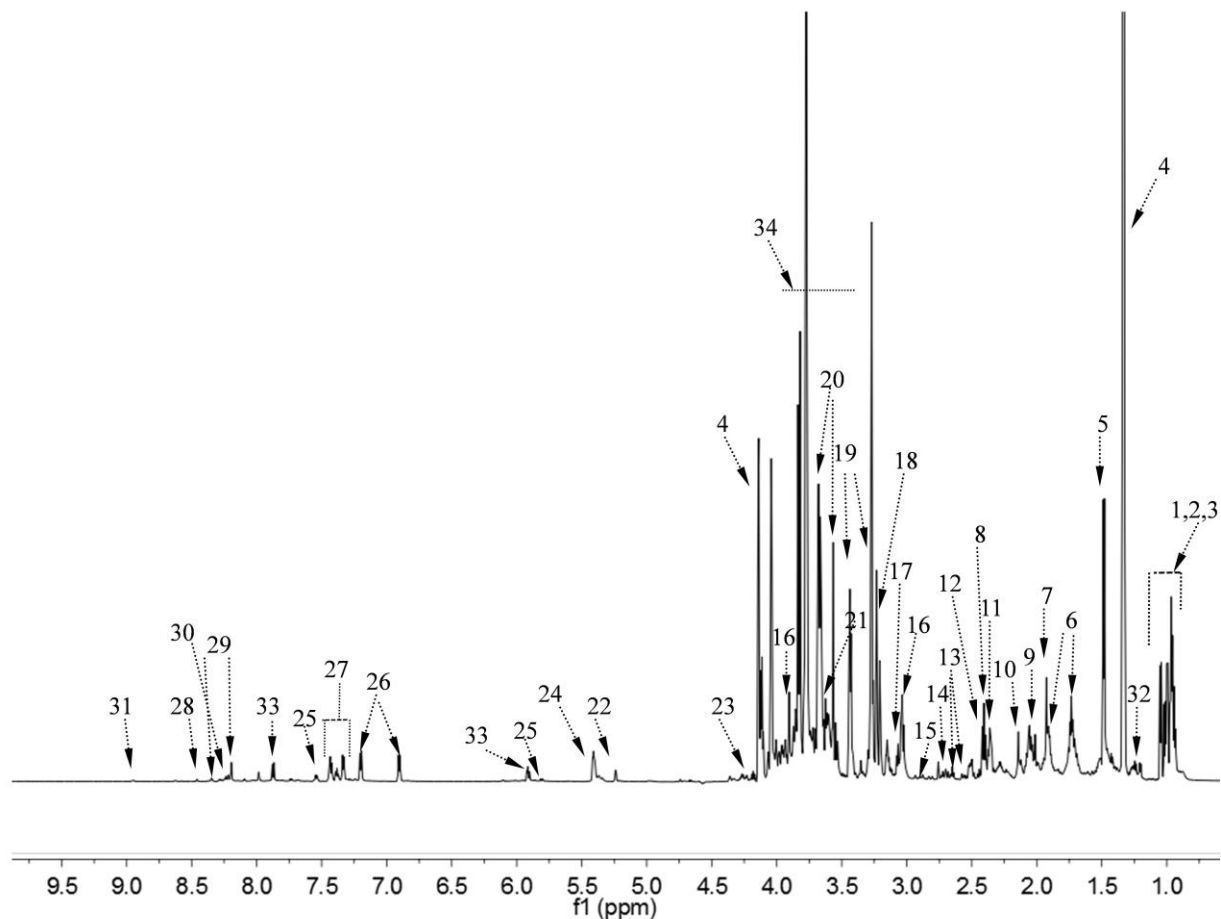

Supplementary figure 1: A representative  $^1\text{H}$  NMR spectra of eutopic endometrial tissue from an endometriosis patient. Leucine; 2: Isoleucine; 3: Valine; 4: Lactate; 5: Alanine; 6: Lysine; 7: Acetate; 8: Succinate; 9: Proline; 10: Methionine; 11: Glutamate; 12: Glutamine; 13: Citrate; 14: Aspartate; 15: Asparagine; 16: Creatine; 17: Ornithine; 18: Choline; 19: Taurine; 20: *myo*-inositol; 21: Glycine; 22:  $\alpha$  Glucose; 23: Threonine; 24: Glycogen; 25: Uracil; 26: Tyrosine; 27: Phenylalanine; 28: Formate; 29: Inosine; 30: Adenine; 31: Nicotinurate; 32: 3-hydroxybutyrate; 33: Uridine; 34: Glucose and mixed amino acids ( $\alpha$  CH) resonances

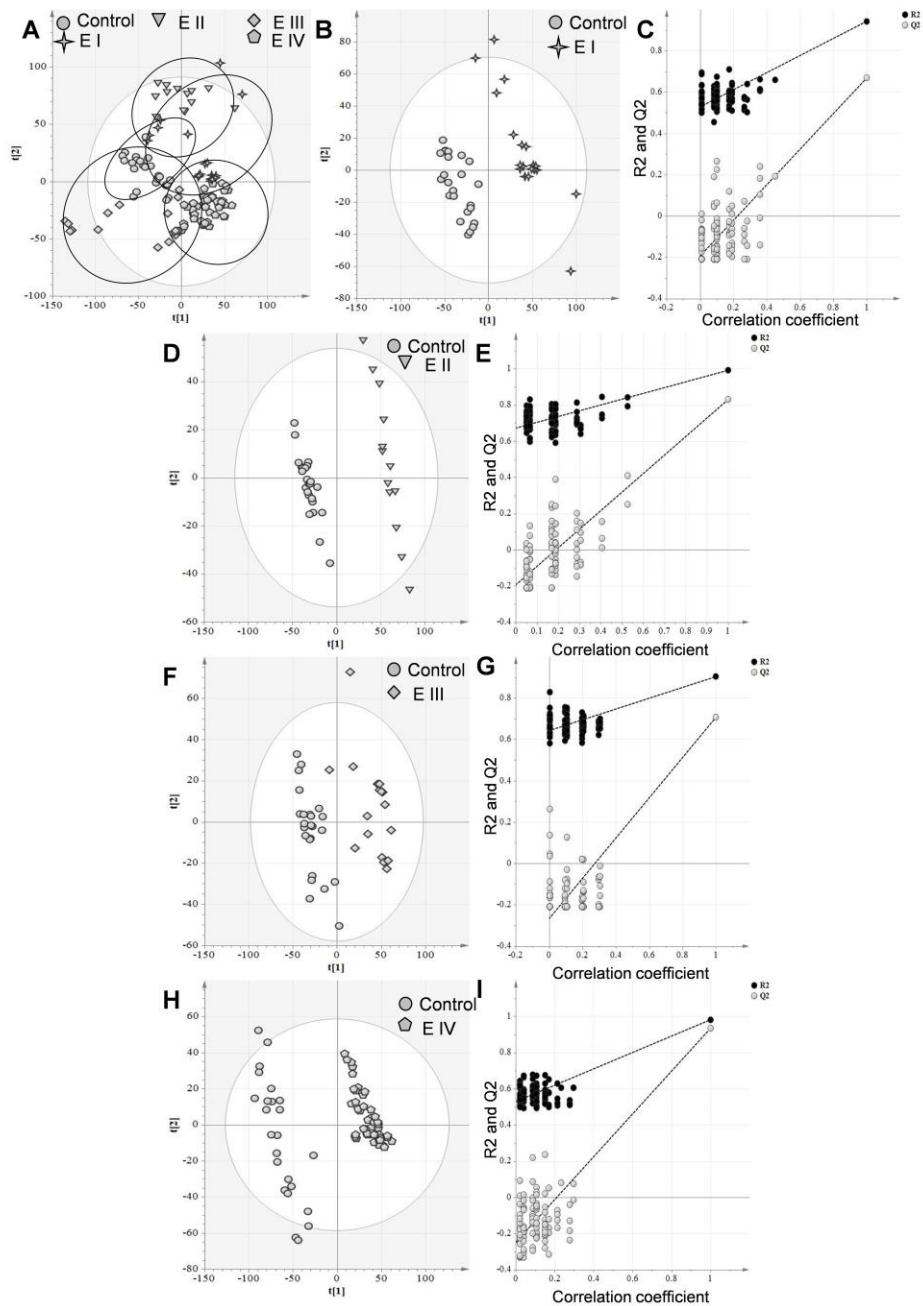

Supplementary figure 2: PCA and PLS-DA analysis of NMR spectra generated with tissue samples. PCA analysis of (A) all stages of endometriosis and controls. PLS-DA analysis of (B) control vs minimal endometriosis (E I), (D) control vs mild endometriosis (E II), (F) control vs moderate endometriosis (EIII), (H) control vs severe endometriosis (EIV). Permutation test statistics for the PLS-DA models of (C) control vs E I with Y-axis intercepts: R2 (0.0, 0.51), Q2 = (0.0, -0.21), (E) control vs E II with Y-axis intercepts: R2 (0.0, 0.68), Q2 = (0.0, -0.19), (G) control vs EIII with Y-axis intercepts: R2 (0.0, 0.66), Q2 = (0.0, -0.26), (I) control vs EIV with Y-axis intercepts: R2 (0.0, 0.52), Q2 = (0.0, -0.25).

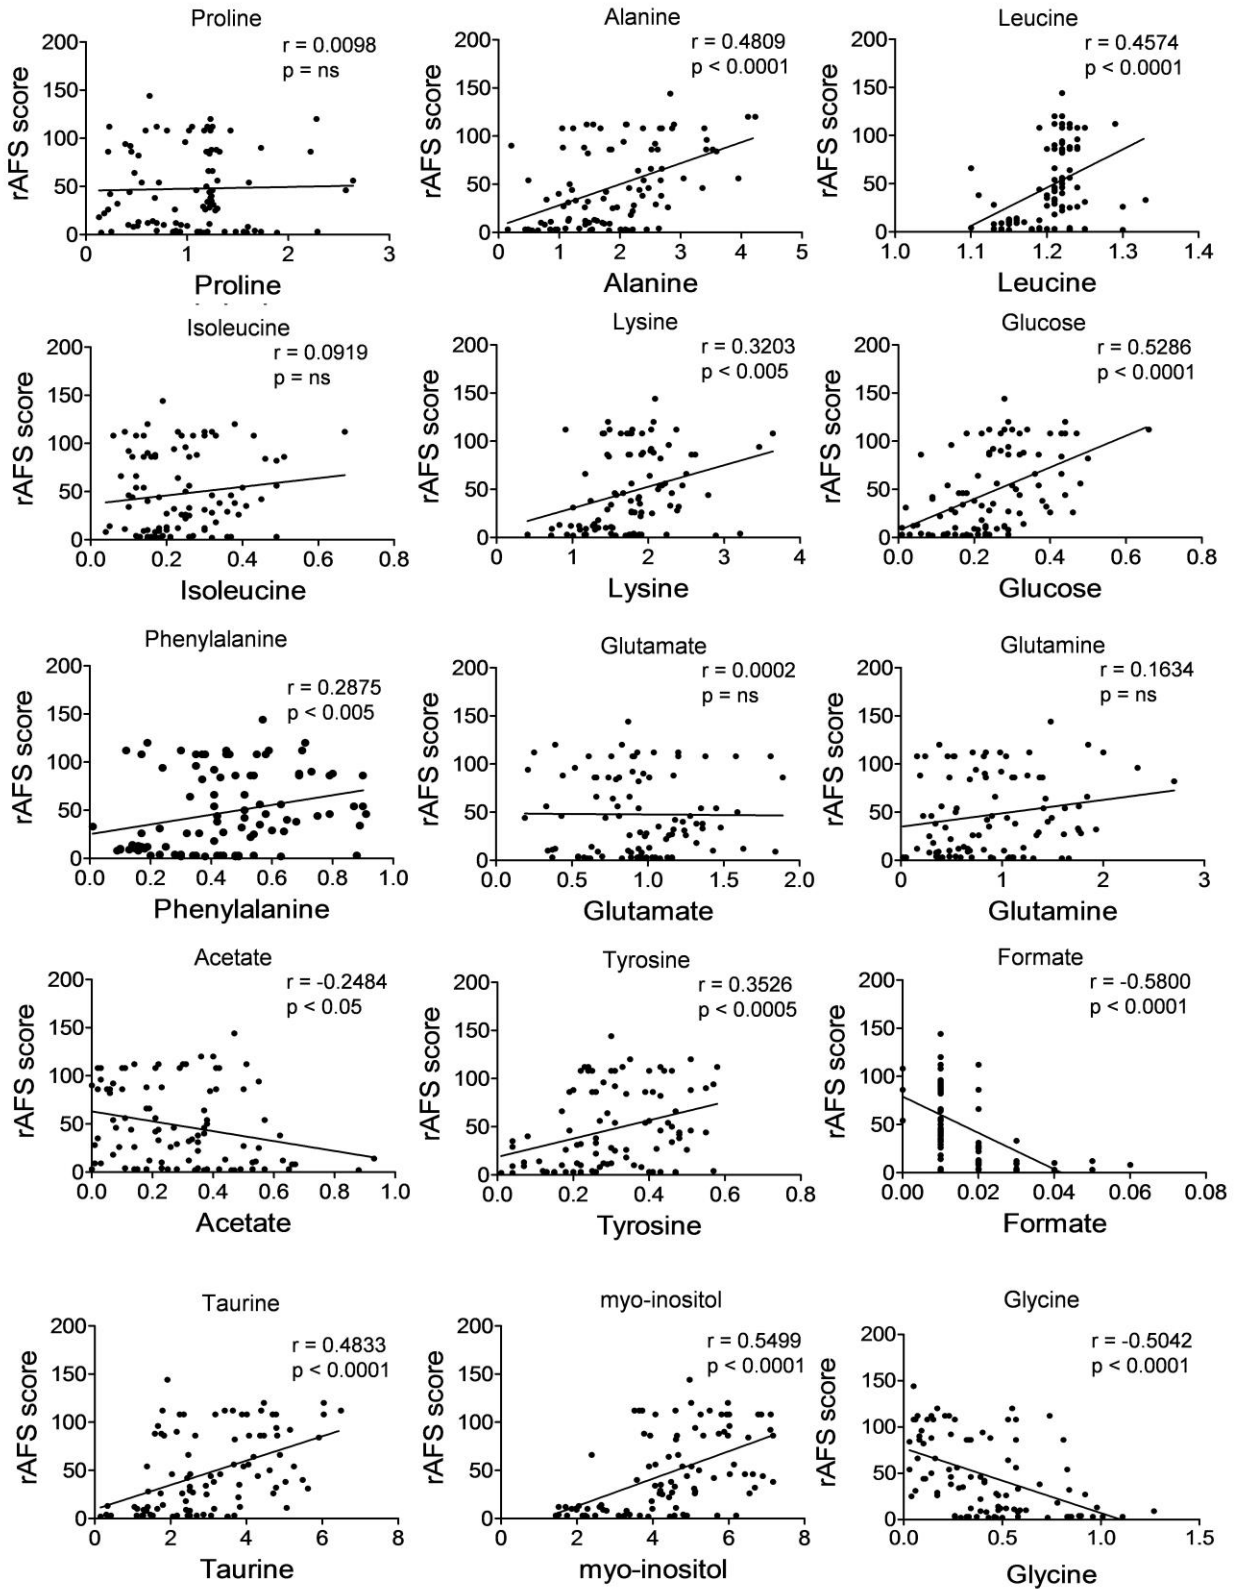

Supplementary figure 3: Correlation analysis between relevant tissue metabolites and rAFS score of women with endometriosis. Nonparametric Spearman correlation test was used
